# Supplementary material
Source: PubMed Central journal article supplement (PMC2643803)
Supplement: supp_29_4_1059__1.pdf [file supp_29_4_1059__1.pdf]

# Cowley\_FigS1

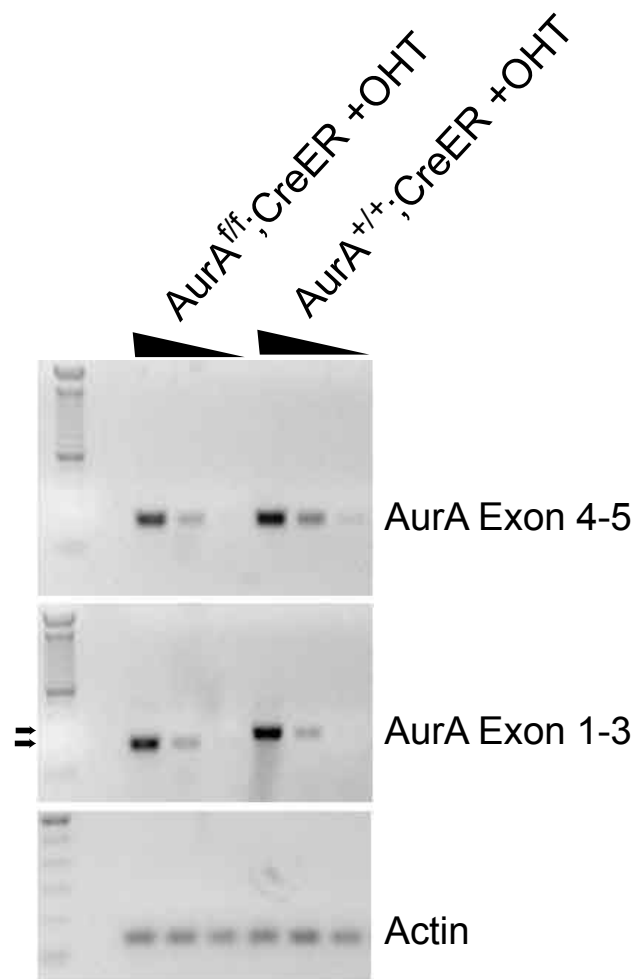

Fig. S1. RT-PCR analysis of AurA expression in MEFs. Primers amplify cDNA regions corresponding to AurA exons 4 and 5 (top), 1-3 (middle) and actin (loading control, bottom). Arrows denote smaller size of PCR product lacking exon 2 (AurA<sup>f/f</sup>;CreER +OHT sample). Black triangles indicate decreasing amounts of starting template going from left to right.

Cowley\_Fig. S2

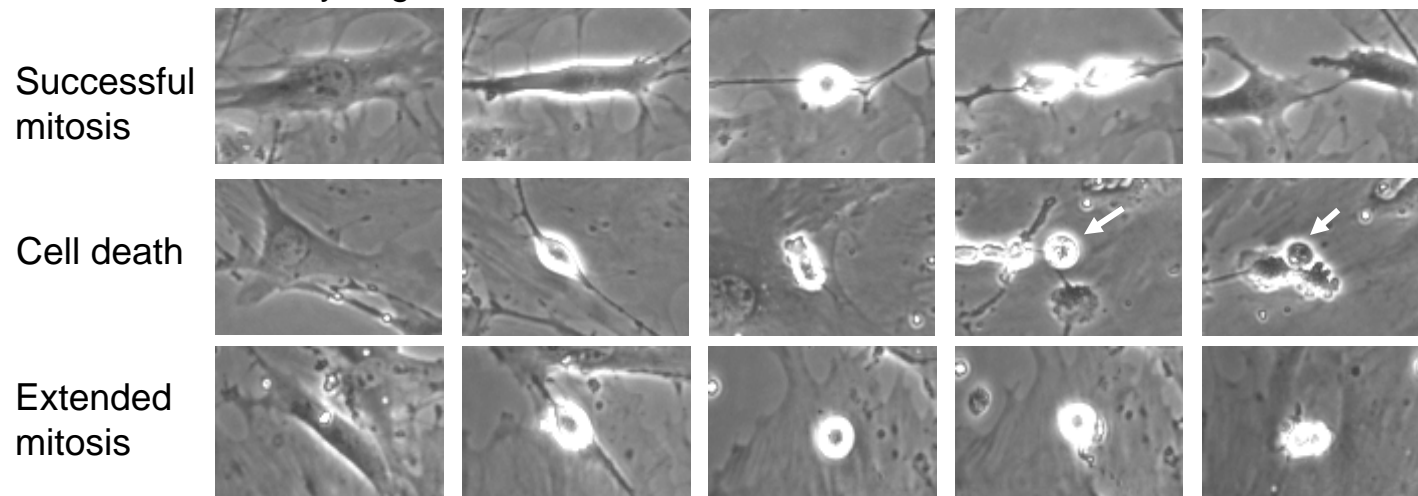

Fig. S2. Mitotic phenotypes observed in time-lapse imaging. Panels show time-lapse images of cells with each of the three phenotypes scored.

Cowley\_Supplemental Table 1.

Genotyping primers for *AurA* mutant mice.

| Allele                     | Primer 1 |                                    | Primer 2 |                               | Product Size |
|----------------------------|----------|------------------------------------|----------|-------------------------------|--------------|
|                            | Name     | Sequence                           | Name     | Sequence                      |              |
| <i>AurA</i> <sup>neo</sup> | Neo3     | GCGATGCCTGCTTGCCGAATATCA           | DCF2     | CCACCACGAAGGCAGTGTTCAATCCTAAA | 872          |
| <i>AurA</i> <sup>oz</sup>  | DCF5     | CAGAGTCTAAGTCGAGATATCACCTGAGGGTTGA | DCE6     | GATGGAAACCCTGAGCACCTGTGAAAC   | 273          |
| <i>AurA</i> <sup>f</sup>   | DCF1     | CCTGTGAGTTGGAAAGGGACATGGCTG        | DCF2     | See above                     | 594          |
| <i>AurA</i> <sup>+</sup>   | DCF1     | See above                          | DCF2     | See above                     | 467          |

All reactions were performed as follows: 94°C 2', 35 cycles of 94°C 15", 58°C 30", 72°C 50", 72°C 5'.

Cowley\_Supplemental Table 2

| Genotype | Cell # | Time (min) | Divided | Exited Without Dividing | Died | Did Not Exit | Genotype | Cell # | Time (min) | Divided | Exited Without Dividing | Died | Did Not Exit |
|----------|--------|------------|---------|-------------------------|------|--------------|----------|--------|------------|---------|-------------------------|------|--------------|
| +/+      | 1      | 30         | X       |                         |      |              | F/F      | 1      | 90         |         | X                       |      |              |
| +/+      | 2      | 30         | X       |                         |      |              | F/F      | 2      | 100        |         | X                       |      |              |
| +/+      | 3      | 30         | X       |                         |      |              | F/F      | 3      | 110        | X       |                         |      |              |
| +/+      | 4      | 30         | X       |                         |      |              | F/F      | 4      | 110        | X       |                         |      |              |
| +/+      | 5      | 30         | X       |                         |      |              | F/F      | 5      | 110        | X       |                         |      |              |
| +/+      | 6      | 30         | X       |                         |      |              | F/F      | 6      | 110        | X       |                         |      |              |
| +/+      | 7      | 30         | X       |                         |      |              | F/F      | 7      | 110        | X       |                         |      |              |
| +/+      | 8      | 30         | X       |                         |      |              | F/F      | 8      | 110        |         | X                       |      |              |
| +/+      | 9      | 30         | X       |                         |      |              | F/F      | 9      | 110        |         | X                       |      |              |
| +/+      | 10     | 30         | X       |                         |      |              | F/F      | 10     | 120        |         | X                       |      |              |
| +/+      | 11     | 30         | X       |                         |      |              | F/F      | 11     | 120        |         | X                       |      |              |
| +/+      | 12     | 30         | X       |                         |      |              | F/F      | 12     | 150        |         | X                       |      |              |
| +/+      | 13     | 30         | X       |                         |      |              | F/F      | 13     | 180        |         | X                       |      |              |
| +/+      | 14     | 40         | X       |                         |      |              | F/F      | 14     | 190        |         | X                       |      |              |
| +/+      | 15     | 40         | X       |                         |      |              | F/F      | 15     | 200        |         |                         | X    |              |
| +/+      | 16     | 40         | X       |                         |      |              | F/F      | 16     | 200        |         | X                       |      |              |
| +/+      | 17     | 40         | X       |                         |      |              | F/F      | 17     | 220        |         | X                       |      |              |
| +/+      | 18     | 40         | X       |                         |      |              | F/F      | 18     | 220        |         | X                       |      |              |
| +/+      | 19     | 40         | X       |                         |      |              | F/F      | 19     | 270        |         | X                       |      |              |
| +/+      | 20     | 40         | X       |                         |      |              | F/F      | 20     | 380        |         |                         | X    |              |
| +/+      | 21     | 40         | X       |                         |      |              | F/F      | 21     | 400        |         | X                       |      |              |
| +/+      | 22     | 40         | X       |                         |      |              | F/F      | 22     | 1090       |         |                         | X    |              |
| +/+      | 23     | 40         | X       |                         |      |              | F/F      | 23     | 1330       |         |                         | X    |              |
| +/+      | 24     | 40         | X       |                         |      |              | F/F      | 24     | 1590       |         |                         |      | X            |
| +/+      | 25     | 40         | X       |                         |      |              | F/F      | 25     | 1750       |         |                         |      | X            |
| +/+      | 26     | 40         | X       |                         |      |              | F/F      | 26     | 1760       |         |                         |      | X            |
| +/+      | 27     | 40         | X       |                         |      |              | F/F      | 27     | 2060       |         | X                       |      |              |
| +/+      | 28     | 50         | X       |                         |      |              |          |        |            |         |                         |      |              |
| +/+      | 29     | 50         | X       |                         |      |              |          |        |            |         |                         |      |              |
| +/+      | 30     | 50         | X       |                         |      |              |          |        |            |         |                         |      |              |
| +/+      | 31     | 60         | X       |                         |      |              |          |        |            |         |                         |      |              |
| +/+      | 32     | 60         | X       |                         |      |              |          |        |            |         |                         |      |              |
| +/+      | 33     | 60         | X       |                         |      |              |          |        |            |         |                         |      |              |
| +/+      | 34     | 80         | X       |                         |      |              |          |        |            |         |                         |      |              |
| +/+      | 35     | 220        | X       |                         |      |              |          |        |            |         |                         |      |              |
| +/+      | 36     | 2140       |         |                         |      | X            |          |        |            |         |                         |      |              |

Fates of OHT-treated MEFs tracked through time-lapse imaging. Only cells that entered mitosis and remained in the field of view throughout the course of the imaging are included. +/+ = *AurA*<sup>+/+</sup>; *R26*<sup>CreER/+</sup>; f/f = *AurA*<sup>f/f</sup>; *R26*<sup>CreER/+</sup>.
